# Supplementary material
Source: publisher figshare collection journal article supplement (https://tandf.figshare.com/articles/dataset/_/9976121)
Supplement: Supplementary file 2 [file 2]

Archive with 3 entries (3 files):
- iiht_a_955932_sm7898.pdf
- iiht_a_955932_sm7895.pdf
- iiht_a_955932_sm7890.pdf
